# Supplementary material for: Activation of the Nrf2 response by intrinsic hepatotoxic drugs correlates with suppression of NF-κB activation and sensitizes toward TNFα-induced cytotoxicity
Source: PubMed Central journal article supplement (PMC4830895; doi:10.1007/s00204-015-1536-3), 2015-05-31
Supplement: 204_2015_1536_MOESM2_ESM.pdf [file 204_2015_1536_MOESM2_ESM.pdf]

| compound                    | conc.( $\mu$ M) | Severity Class | DILI-Concern      | DILI-Score   |
|-----------------------------|-----------------|----------------|-------------------|--------------|
| acetaminophen               | 5000            | 5              | Most-DILI-Concern | DILI-Reports |
| isoniazid                   | 10000           | 8              | Most-DILI-Concern | Severe-DILI  |
| phenobarbital               | 10000           | 3              | Less-DILI-Concern | NA           |
| valproic acid               | 5000            | 8              | Most-DILI-Concern | Severe-DILI  |
| clofibrate                  | 300             | 3              | Less-DILI-Concern | NA           |
| rifampicin                  | 70              | 8              | Most-DILI-Concern | DILI-Reports |
| omeprazole                  | 600             | 4              | Less-DILI-Concern | NA           |
| indomethacin                | 200             | 5              | Most-DILI-Concern | High-Concern |
| chlorpromazine              | 20              | 2              | Less-DILI-Concern | DILI-Reports |
| carbamazepine               | 300             | 7              | Most-DILI-Concern | High-Concern |
| diclofenac                  | 400             | 8              | Most-DILI-Concern | High-Concern |
| nitrofurantoin              | 125             | 8              | Most-DILI-Concern | High-Concern |
| diazepam                    | 250             | 4              | Less-DILI-Concern | NA           |
| cyclophosphamide            | 2000            | 5              | Less-DILI-Concern | NA           |
| phenytoin                   | 60              | 8              | Most-DILI-Concern | NA           |
| allopurinol                 | 140             | 8              | Most-DILI-Concern | NA           |
| propylthiouracil            | 4000            | 8              | Most-DILI-Concern | NA           |
| gemfibrozil                 | 100             | 3              | Less-DILI-Concern | NA           |
| amiodarone                  | 7               | 8              | Most-DILI-Concern | Severe-DILI  |
| sulfasalazine               | 150             | 5              | Most-DILI-Concern | NA           |
| cimetidine                  | 300             | 2              | Less-DILI-Concern | NA           |
| haloperidol                 | 20              | 5              | Less-DILI-Concern | NA           |
| fluphenazine                | 20              | 3              | Less-DILI-Concern | NA           |
| thioridazine                | 15              | 5              | Less-DILI-Concern | NA           |
| adapin                      | 75              | 4              | Less-DILI-Concern | NA           |
| labetalol                   | 140             | 8              | Most-DILI-Concern | Severe-DILI  |
| methyltestosterone          | 20              | 2              | Less-DILI-Concern | NA           |
| glibenclamide               | 20              | 3              | Less-DILI-Concern | DILI-Reports |
| griseofulvin                | 20              | 8              | Most-DILI-Concern | NA           |
| flutamide                   | 50              | 8              | Most-DILI-Concern | Severe-DILI  |
| azathioprine                | 73              | 3              | Less-DILI-Concern | High-Concern |
| ketoconazole                | 15              | 8              | Most-DILI-Concern | Severe-DILI  |
| tetracycline                | 25              | 2              | Less-DILI-Concern | High-Concern |
| lomustine                   | 120             | 3              | Less-DILI-Concern | NA           |
| ciprofloxacin               | 25              | 7              | Most-DILI-Concern | NA           |
| tamoxifen                   | 25              | 8              | Most-DILI-Concern | High-Concern |
| methyl dopa                 | 50              | 8              | Most-DILI-Concern | High-Concern |
| methimazole                 | 10000           | 8              | Most-DILI-Concern | DILI-Reports |
| tacrine                     | 80              | 7              | Most-DILI-Concern | High-Concern |
| imipramine                  | 15              | 3              | Less-DILI-Concern | High-Concern |
| amitriptyline               | 15              | 5              | Less-DILI-Concern | NA           |
| ibuprofen                   | 150             | 3              | Less-DILI-Concern | DILI-Reports |
| naproxen                    | 600             | 3              | Less-DILI-Concern | High-Concern |
| quinidine                   | 50              | 3              | Less-DILI-Concern | NA           |
| furosemide                  | 2500            | 2              | Less-DILI-Concern | DILI-Reports |
| fenofibrate                 | 30              | 3              | Less-DILI-Concern | NA           |
| chlorpropamide              | 750             | 2              | Less-DILI-Concern | DILI-Reports |
| nicotinic acid              | 10000           | 7              | Most-DILI-Concern | NA           |
| erythromycin ethylsuccinate | 5               | 5              | Most-DILI-Concern | NA           |
| ethambutol                  | 4000            | 8              | Most-DILI-Concern | NA           |
| mefenamic acid              | 150             | 3              | Less-DILI-Concern | NA           |
| famotidine                  | 700             | 3              | Less-DILI-Concern | DILI-Reports |
| ranitidine                  | 4000            | 5              | Less-DILI-Concern | High-Concern |
| nifedipine                  | 150             | 3              | Less-DILI-Concern | DILI-Reports |
| diltiazem                   | 150             | 4              | Most-DILI-Concern | NA           |
| captopril                   | 8000            | 6              | Less-DILI-Concern | NA           |
| enalapril                   | 2000            | 4              | Less-DILI-Concern | High-Concern |
| papaverine                  | 60              | 5              | Most-DILI-Concern | NA           |
| penicillamine               | 10000           | 2              | Less-DILI-Concern | NA           |
| sulindac                    | 3000            | 8              | Most-DILI-Concern | High-Concern |
| disopyramide                | 3500            | 2              | Less-DILI-Concern | NA           |
| mexiletine                  | 300             | 3              | Most-DILI-Concern | NA           |

|                           |       |                  |                   |               |
|---------------------------|-------|------------------|-------------------|---------------|
| acetazolamide             | 600   | 8                | Most-DILI-Concern | NA            |
| disulfiram                | 60    | 8                | Most-DILI-Concern | High-Concern  |
| colchicine                | 4000  | 6                | Less-DILI-Concern | NA            |
| tolbutamide               | 2000  | 2                | Less-DILI-Concern | DILI-Reports  |
| acarbose                  | 10000 | 8                | Most-DILI-Concern | NA            |
| simvastatin               | 30    | 3                | Less-DILI-Concern | High-Concern  |
| meloxicam                 | 50    | 3                | Less-DILI-Concern | NA            |
| ethionamide               | 600   | 3                | Less-DILI-Concern | NA            |
| ticlopidine               | 20    | 4                | Most-DILI-Concern | High-Concern  |
| tiopronin                 | 2000  | 3                | Less-DILI-Concern | NA            |
| promethazine              | 35    | 5                | Less-DILI-Concern | NA            |
| dantrolene                | 10    | 8                | Most-DILI-Concern | Severe-DILI   |
| clomipramine              | 10    | 8                | Most-DILI-Concern | DILI-Reports  |
| terbinafine               | 15    | 8                | Most-DILI-Concern | High-Concern  |
| danazol                   | 35    | 8                | Most-DILI-Concern | NA            |
| etoposide                 | 330   | 3                | Less-DILI-Concern | NA            |
| venlafaxine               | 1200  | 7                | Less-DILI-Concern | DILI-Reports  |
| clozapine                 | 50    | 5                | Most-DILI-Concern | High-Concern  |
| buspirone                 | 30    | 3                | Less-DILI-Concern | Transaminitis |
| nefazodone                | 30    | 8                | Most-DILI-Concern | Severe-DILI   |
| triazolam                 | 10    | 4                | Less-DILI-Concern | NA            |
| trimethadione             | 10000 | 5                | Most-DILI-concern | NA            |
| cyclosporine A            | 6     | 7                | Most-DILI-Concern | NA            |
| diethyl maleate           | 1500  | oxidative stress | oxidative stress  | NA            |
| LPS                       | 300   | inflammation     | inflammation      | NA            |
| TNF                       | 50    | inflammation     | inflammation      | NA            |
| interleukin 1 beta, human | 50    | inflammation     | inflammation      | NA            |
| butylated hydroxyanisole  | 200   | oxidative stress | oxidative stress  | NA            |
| amphotericin B            | 2     | 3                | Less-DILI-Concern | NA            |
| fluoxetine hydrochloride  | 20    | 3                | Less-DILI-Concern | DILI-Reports  |
| dexamethasone             | 300   | 3                | Less-DILI-Concern | Transaminitis |
| rosiglitazone maleate     | 300   | 5                | Most-DILI-Concern | High-Concern  |
| propranolol               | 100   | 3                | Less-DILI-Concern | DILI-Reports  |
